1 **Impact of within-tree organ distances on floral induction and fruit growth in apple tree:**  
2 **implication of carbon and gibberellin organ contents.**

3

4 Farés Belhassine<sup>1</sup>, Sébastien Martinez<sup>1</sup>, Sylvie Bluy<sup>1</sup>, Damien Fumey<sup>2</sup>, Jean-Jacques Kelner<sup>1</sup>,  
5 Evelyne Costes<sup>1</sup>, Benoît Pallas<sup>1\*</sup>

6

7 <sup>1</sup>UMR AGAP, Univ. Montpellier, INRA, CIRAD, Montpellier SupAgro, Univ Montpellier,  
8 34398 Montpellier Cedex5, France

9 <sup>2</sup>ITK, Montpellier, France.

10

11 \*For correspondence:

12 Benoît Pallas

13 e-mail address : benoit.pallas@inra.fr

14 Phone number: +33 4 67 61 59 23

15

16 Running title: Impact of organ distances on floral induction and fruit growth

17

18 Key words: leaf/fruit removal, floral induction, fruit weight, non-structural carbohydrates,  
19 source-sink relationships, shoot/branch autonomy, *Malus × domestica* Borkh

20

21

22 **Abstract**

23 In plants, organs are inter-dependent for growth and development. Here, we aimed to  
24 investigate the distance at which interaction between organs operates and the relative  
25 contribution of within-tree variation in carbohydrate and hormonal contents on floral  
26 induction and fruit growth, in a fruit tree case study. Manipulations of leaf and fruit numbers  
27 were performed in two years on ‘Golden delicious’ apple trees, at the shoot or branch scale or  
28 one side of Y-shape trees. For each treatment, floral induction proportion and mean fruit  
29 weight were recorded. Gibberellins content in shoot apical meristems, photosynthesis, and  
30 non-structural carbohydrate concentrations in organs were measured. Floral induction was  
31 promoted by leaf presence and fruit absence but was not associated with non-structural  
32 content in meristems. This suggests a combined action of promoting and inhibiting signals  
33 originating from leaves and fruit, and involving gibberellins. Nevertheless, these signals act at  
34 short distance only since leaf or fruit presence at long distances had no effect on floral  
35 induction. Conversely, fruit growth was affected by leaf presence even at long distances when  
36 sink demands were imbalanced within the tree, suggesting long distance transport of  
37 carbohydrates. We thus clarified the inter-dependence and distance effect among organs,  
38 therefore their degree of autonomy that appeared dependent on the process considered, floral  
39 induction or fruit growth.

40

41

## 42 **Introduction**

43 In plants, the determination of organ nature, their development and growth are considered as  
44 interdependent. For instance, the position at which flowers develop is linked to the number of  
45 nodes developed from the seed (Sachs, 1999). Architectural analyses have highlighted highly  
46 structured organization in a large range of plants, with particular organ types being observed  
47 at particular positions and times during ontogeny (Barthélémy and Caraglio, 2007). This has  
48 been demonstrated for instance for the position of reproductive organs in *Quercus ilex* or  
49 *Pinus halepensis* (Barthélémy and Caraglio, 2007) or for flower buds along axes in different  
50 *Rosaceae* species (Costes *et al.*, 2014). The inter-dependence and differential development of  
51 organs within plants are assumed to depend on water, carbohydrates, hormones, mineral  
52 nutrients, etc. that are transported within the plants. Both the availability of these resources  
53 and the total number of competing organ define a developmental and growth context for each  
54 organ depending on its position during plant life span. Among these shared resources,  
55 carbohydrates have been particularly studied as they are considered as a main limiting factor  
56 for organ growth (Grossman and DeJong, 1995) and as a regulator of the transition between  
57 vegetative and reproductive phase in plant life (Rolland *et al.*, 2006). In the particular case of  
58 fruit trees, the number, position of fruits, as well as their growth at harvest are dependent on  
59 the capability of a given meristem to be floral, then of this flower to fruit set, and finally of a  
60 fruit to capture resources for its growth.

61 In fruit trees, the capability of a shoot apical meristems (SAM) to be floral induced is  
62 strongly affected by the presence of fruit during the growing season. A first hypothesis  
63 explaining floral induction (FI) inhibition in conditions of high crop load is associated with a  
64 competition for carbohydrates between meristems and fruit (Monselise and Goldschmidt,  
65 1982). Besides this “carbon” hypothesis, Chan and Cain (1967) have demonstrated that FI is  
66 inhibited by seed development through hormones. This hypothesis was confirmed by

67 experiments on seedless apple and pear cultivars suggesting that seeds may inhibit FI,  
68 probably by gibberellins (Dennis and Neilsen, 1999). Gibberellins (GA) are considered  
69 among the pathways involved in floral induction control in *Arabidopsis thaliana* (Jung *et al.*,  
70 2017). However, their effect is currently considered as inverse in *Arabidopsis thaliana* and in  
71 perennial woody plants. Indeed, GA promotes the transition from vegetative to reproductive  
72 development of buds in *Arabidopsis* (Wilson *et al.*, 1992), while it is assumed to inhibit FI in  
73 fruit trees such as mango (Nakagawa *et al.*, 2012) and apple (Wilkie *et al.*, 2008). GA12 has  
74 been observed as the transported GA form moving within the plant through the vascular  
75 system in *Arabidopsis* (Regnault *et al.*, 2015). In the apple tree, GA4 has been assumed to  
76 move from fruit to SAM in apple tree (Ramírez *et al.*, 2004). The involvement of GA in FI  
77 control was further confirmed by differential expressions of genes involved in the GA  
78 biosynthesis pathway (GA20ox and GA2ox) in SAM of apple trees with heavy or low crop  
79 loads (Guitton *et al.*, 2016). This study also suggested a context of carbohydrate starvation, in  
80 SAM of trees in high cropping conditions. Therefore, the co-involvement of carbohydrate and  
81 hormones in FI control appears as an assumption to further investigate. It implies the  
82 involvement of several processes: photosynthesis by leaves, transport from leaves to sinks,  
83 including SAM, but also the presence of GA in SAM likely the active forms GA4 and GA1  
84 (Ramírez *et al.*, 2004). Moreover, leaves may have a dual role in FI control since, in addition  
85 to be source of carbohydrates, they are also producing FLOWERING LOCUS T (FT) protein,  
86 which is transported to the SAM to activate floral induction in many species, including fruit  
87 species (Hanke *et al.*, 2007). Nevertheless, it is currently still unclear at which distance the  
88 different “signals” originating from fruit and leaves act on FI in SAM.

89         Regarding carbohydrates, partitioning from sources to sinks is considered as a function  
90 of source supply, sink demand and distances between them (Lacointe 2000). Nevertheless, in  
91 fruit trees there is no clear consensus about the impact of distances between sources and sink

92 on carbohydrate allocation and on their consequences on the existing organ growth variability  
93 within the trees. Depending on their strength, i.e. the ability of an organ to import assimilate,  
94 sinks can use carbohydrates from nearby or distant sources. Carbohydrates can move at short  
95 distances, i.e. from non-fruiting to fruiting shoots (Walcroft *et al.*, 2004; Pallas *et al.*, 2018) to  
96 sustain fruit growth or at longer distances, i.e. between branches (Palmer *et al.*, 1991, Hansen  
97 1997). Conversely, authors have suggested that branches can be considered as autonomous  
98 (Sprugel *et al.*, 1991). For instance, in shading experiments on walnut, sunlit branches have  
99 been observed to grow faster than shaded ones without any allocation of carbon to distant  
100 sinks (Lacointe *et al.*, 2004), thus emphasizing the sink strength limitation to long distance  
101 transport. This limitation of long distance carbon transport has potential impacts on  
102 developmental and growth processes. For instance, part-tree thinning of flower cluster has  
103 been shown to enhance branch vegetative growth and floral induction in the thinned tree sides  
104 (Palmer *et al.*, 1991; Grossman and Dejong, 1998). Similarly, shoot growth and to some  
105 extent starch accumulation in woody organs are impacted by fruit proximity (Berman and  
106 Dejong, 2003; Castillo-Llanque and Rapoport, 2011). Moreover, carbon transport and  
107 allocation change during a season. Indeed carbon labelling experiments have shown that  
108 carbon is allocated from reserves to support new shoot growth in spring (Kandiah, 1979a). At  
109 fall, carbon accumulate in leaves moves at long distances to roots to contribute to root growth  
110 and storage, before being reallocated to new growth in the next year (Hansen, 1967; Kandiah,  
111 1979b).

112 In plant, carbon allocation between organs is commonly analyzed through the  
113 variations in organ biomass and non-structural carbohydrate (NSC) content. Among the  
114 different NSC forms in apple tree, starch, sorbitol and sucrose are the carbohydrates directly  
115 derived from the photosynthetic activity, with sorbitol and sucrose being the mobile forms for  
116 carbohydrate transport (Escobar-Gutiérrez 1996, Teo *et al.*, 2006). Sorbitol and sucrose are

117 transferred through the phloem to the sinks where they are converted into glucose and  
118 fructose (Teo *et al.*, 2006). Starch is commonly stored in reserve organs during the vegetative  
119 season. This NSC form is accumulated in reserve organs, where it can be mobilized for  
120 regrowth in spring or to buffer source-sink imbalances during the growing season (Sala *et al.*,  
121 2012). Moreover, starch concentration, is directly associated to the ratio between source  
122 activity and sink demand (Naschitz *et al.*, 2010; Sala *et al.*, 2012).

123 In this study, we assumed that distances among organs and availability of resources  
124 are involved in both organ development (here floral induction) and growth (here considered as  
125 mean fruit weight). Our aim was to investigate the relative contribution of tree carbon  
126 balance, source-sink distances and GA availability in SAM on the FI and fruit growth. For  
127 this, we manipulated within-tree source-sink relationships during two years on ‘Golden  
128 delicious’ apple cultivar. We set trees in either high (ON trees) or low (OFF trees) crop loads,  
129 reducing by half the number of leaves (sources for both carbohydrates and florigen) or fruit  
130 (sources of gibberellins and sinks for carbohydrates). These manipulations were performed at  
131 different scales in the trees (shoots, branches and one side of the Y-shape trees) in order to  
132 clarify the effect of distances between sources and sinks. Moreover, we considered the within-  
133 tree variations in carbon acquisition (leaf photosynthetic activity) and accumulation (NSC  
134 concentration) and the gibberellins content in SAM to explore their respective involvement on  
135 FI. This study provides (i) new evidence of the likely co-involvement of gibberellins from  
136 fruits and signals originated from leaves other than carbohydrates in FI control and (ii) new  
137 elements on the debate on organ autonomy in trees with respect to carbohydrate transport in  
138 trees.

139

140

141

142

143

## 144 **Material and methods**

145

### 146 *Plant material and growing conditions*

147 The experiment was carried out from 2016 to 2018 on 10-year-old apple trees (cv. ‘Golden  
148 Delicious’). The orchard was located at the SudExpé experimental station in Marsillargues, in  
149 the south of France (43°66’N 4°18’E). Trees were initially planted in 1998 with ‘Tentation’  
150 cultivar grafted on ‘Pajam2’ rootstock and then top grafted with ‘Golden delicious’ in 2005.  
151 The orchard was composed of four rows of 75 trees, each tree composed either of one vertical  
152 axis or of two main axes (Y-shape trees) arising five centimeters above the grafting point.  
153 Pruning and thinning were applied according to commercial practices before the beginning of  
154 the experiment in 2016. During the experimental period, all the trees were irrigated and  
155 fertilized to avoid any water or mineral deficiency.

156

### 157 *Varying source-sink relationships by leaf and fruit removal treatments*

158 In spring 2016, around 65 trees in the orchard were set in OFF conditions by removing all the  
159 flowers after full bloom. No thinning was performed on the same number of trees, in which  
160 complete fruit removal was performed in 2015 to get high crop load in 2016. These trees were  
161 then considered as ON trees. In the following year (2017), the cropping status was reversed.  
162 In this years, all the flowers of OFF trees were removed just after full bloom to ensure a crop  
163 load equal to zero. To determine the period of FI in our conditions, a specific experiment was  
164 carried out. Assuming that the period of irreversible inhibition of FI was between 30 and 70  
165 days after full bloom (DAFB) (Foster et al., 2003, Haberman et al., 2016), young fruit were  
166 completely removed on a selection of ON trees, at successive dates during this period. Fruit

167 removal was performed at six dates (one tree per date): 30, 36, 42, 50, 56 and 70 DAFB in  
168 2016 and at four dates in 2017 (37, 43, 50, and 58 DAFB).

169 On the two tree subsets in either ON or OFF conditions, 11 different treatments were  
170 set up (three trees per treatment) in springs 2016 and 2017. In order to modify fruit and leaves  
171 number, half of the leaves or half of the fruit were removed on the trees. Moreover, leaves and  
172 fruit were removed in different parts of the trees in order to modify the distances between the  
173 remaining leaves and fruit. Leaves and fruit were removed on either half of the shoots, half of  
174 the branches or one side of the Y-shape trees (Figure 1). New leaves that appeared after the  
175 first defoliation in spring were frequently removed throughout the growing season on the trees  
176 subjected to leaf removal. Trees not subjected to leaf or fruit removal either on ON and OFF  
177 crop load, were considered as controls. Another set of trees (called additional trees), in either  
178 ON or OFF conditions and not subjected to leaf or fruit removal was used to build a reference  
179 relationship between tree crop load, proportion of FI and mean fruit weight. 69, 103 and 65  
180 trees of the field were considered in 2015, 2016 and 2017 to build this relationship.

181 Crop load was estimated in each year by dividing the harvested fruit number per tree  
182 by its trunk cross sectional area (e.g. Francesconi et al., 1996). Trunk cross sectional area was  
183 computed assuming a cylinder shape by measuring in spring the trunk circumference at 10 cm  
184 above the grafting zone. For Y-shape trees, crop load was computed for both sides of the tree  
185 separately, considering them as mono-axial trees. The tree crop load of Y-Shape trees was  
186 then determined, considering this treatment as a combination of two mono-axial trees, by the  
187 mean crop load of the two sides of the trees.

188

189 *Development and growth variables: floral SAM proportion and mean fruit weight at harvest*

190 The treatment effect on FI proportion in SAM was estimated at full bloom in the spring  
191 following treatment in 2017 and 2018 on all the trees including the additional trees and those



192 subjected to sequential thinning in spring. FI proportion was estimated as the ratio of the total  
193 number of reproductive buds to the total number of growing buds. This proportion was  
194 estimated on six randomly distributed first-order branches per tree in each treatment,  
195 considering the leaf or fruit removal conditions (foliated/defoliated, fruiting/non-fruiting, 3  
196 branches per condition). Unfortunately, no data were recorded for the trees subjected to fruit  
197 removal at the shoot scale in 2016.

198 At harvest, in early September of each year, fruit were collected on each treatment.  
199 Fruit were sorted by different parts of each tree considering whether they were subjected or  
200 not to leaf or fruit removal. All the fruit were collected on each tree except for the treatment  
201 performed at the shoot scale for which fruit were collected on two branches per tree, only.  
202 Then, each set of fruit was weighted and the mean fruit weight was estimated as the ratio of  
203 the total fruit weight to the number of fruit.

204

#### 205 *Responses of leaf photosynthesis and starch content*

206 Leaf photosynthesis and NSC contents were measured on August 2017 (from 119 to 145  
207 DAFB) on fully expanded leaves belonging to short or medium shoots (shorter than 20cm,  
208 Costes et al., 2003) and fully exposed to sunlight. Measurements were performed on ON and  
209 OFF trees and on foliated parts of the trees with leaf removal treatments and on both fruiting  
210 and non-fruiting parts of the trees with fruit removal treatments. Three measurements were  
211 performed for each tree and condition (fruit or leaf presence/absence). Measurements were  
212 done between 8 and 12 am, with a infra-red gas analyzer (LI-6400, LICOR, Lincoln,  
213 Nebraska, USA) under controlled conditions within the growth chamber known to be non-  
214 limiting for photosynthesis (Massonnet *et al.*, 2007) (photosynthetic photon flux density =  
215  $1800 \mu\text{mol}^{-2}\text{s}^{-1}$ , relative humidity = RH = 70%,  $\text{CO}_2 = 400\text{ppm}$ ,  $T = 25^\circ\text{C}$ ).

216 After each photosynthesis measurement, the leaf, the entire annual shoot (called stem)  
217 on which the leaf was located, the SAM of this shoot and a 5 cm section of the one-year-old  
218 wood supporting it were sampled for measuring their NSC content. Three replicates of all  
219 these organs were sampled on each tree and for each condition (fruit or leaf  
220 presence/absence). Samples were placed immediately in liquid nitrogen and stored at -20°C  
221 for about one week. Then, they were freeze-dried and grinded to fine powders using a ball  
222 grinder. Starch concentrations were then determined for all the organs. In SAM, glucose,  
223 fructose, sorbitol and sucrose concentrations were also evaluated. All these analyses were  
224 performed following the protocol described in Pallas et al., (2018).

225

#### 226 *GA concentrations in SAM*

227 GA content measurements, were performed on SAM collected on 31 May 2017 (58 DAFB),  
228 i.e. at the expected date of FI in short shoots (Foster *et al.*, 2003). SAM were sampled on short  
229 to medium shoots that had recently stopped growing and did not formed protecting scars yet.  
230 SAM were collected on ON and OFF control trees, on trees subjected to fruit or leaf removal  
231 on half of the branches and on trees subjected to fruit removal on one side of Y-shape trees.  
232 Nine SAM were collected on each part of the trees (foliated/defoliated, fruiting/non-fruiting)  
233 and were gathered together for each tree. All samples were conserved at -80°C before being  
234 freeze dried and sent for GA quantification at the Plant Hormone Quantification Service in the  
235 Institute for Plant Molecular and Cell Biology (IBMCP), Valencia, Spain.

236 Fourteen GA forms produced in the two GAs biosynthesis pathways regulated by the  
237 activities of GA20-oxidases (GA20ox), GA3-oxidases (GA3ox) and GA2-oxidases (GA2ox)  
238 were investigated (Supplementary material figure S1). They include bio-active forms (GAs 4  
239 and 1), degradation forms (GAs 51, 34, 29 and 8) and intermediate forms (GAs 12, 15, 24, 53,  
240 44 and 19)

241

242 *Statistical analyses*

243 All statistical analyses were performed with R software (R Development Core team, 2013).

244 We investigated the effects of the combination of (i) the tree crop load status (ON or OFF  
245 trees), (ii) the tree treatment (control, leaf removal, and fruit removal), (iii) the scale (tree,  
246 shoot, branch, and one side of the Y-shape tree) at which treatments were performed and (iv)  
247 the condition within the tree (foliated, defoliated, fruiting and non-fruiting). The effect of all  
248 these combinations was tested on photosynthesis, NSC concentrations, GA concentrations and  
249 FI proportion, with a one-way ANOVA followed by a Tukey HSD test for pairwise  
250 comparison. Linear models were used for continuous variables and a general linear model of  
251 the binomial family was used for FI proportion. For GA and due to the low number of  
252 replicates (one per tree and condition), the effect of fruit presence/absence was also tested  
253 using Kruskal-Wallis test gathering samples from control ON and fruiting parts of trees  
254 (originated from branch and Y-Shape treatments) and from control OFF and non-fruiting parts  
255 of trees.

256 The dataset of additional trees with a large range of crop loads, obtained in 2015, 2016  
257 and 2017 was used to fit a relationship between the tree crop load and the FI proportion  
258 (sigmoidal adjustment) or the mean fruit weight (exponential adjustment). The residuals  
259 between observed values for a given treatment and the general trend of FI proportion or fruit  
260 weight over different crop loads were used to test the treatment effects under comparable crop  
261 load conditions. As for raw variables, treatment effects on residuals were assessed by a one-  
262 way ANOVA followed by a Tukey HSD test.

263

264 **Results**

265

266 *Tree crop load differed between treatments*

267 Crop load was lower in 2016 and 2017, independently of treatments and displayed values  
268 equal to 12.1 and 20.7 fruit.cm<sup>-2</sup> for control ON trees (Table 1). Crop load varied significantly  
269 among treatments when the treatments were compared altogether (P=0.0212 in 2016 and  
270 P=0.0012 in 2017). Considering values averaged over 2016 and 2017 and compared to control  
271 ON treatments, tree crop load was reduced by 25.6 %, 54.3% and 32.4% by fruit removal  
272 treatments at the shoot and branch scales and on one side of Y-shape tree, respectively. A  
273 lower crop load compared to the control ON trees was observed for all the leaf removal  
274 treatments except shoot and branch treatments in 2016 but this difference remained non-  
275 significant. Moreover, in each year, crop loads also varied among the three trees of each  
276 treatment, with large standard deviations observed in some cases.

277

278 *Floral induction in SAM occurs after treatment onset.*

279 The complete fruit removal performed sequentially in springs 2016 and 2017 on a subset of  
280 ON trees allowed evaluating the date after which the inhibition of FI by fruit presence was no  
281 longer reversible. The quantification of FI proportion in the following spring revealed that FI  
282 was no longer possible at 70 DAFB (Table 2). At that date, FI proportion reached values  
283 similar to those of control ON trees. Conversely, when fruit removal was performed before 50  
284 DAFB, FI proportion was close to 100% as observed for OFF control trees, in both years  
285 (Table 2). Assuming that dates of FI were similar for all the buds in trees, this suggests that FI  
286 likely occurred during a short period between 50 and 70 DAFB. This shows that our  
287 experimental design was relevant since treatments were performed before 50 DAFB at a date  
288 when the SAM fate was not yet determined.

289

290 *FI proportion is affected by leaf and fruit presence and by their distance to the SAM.*

291 During the experiment and on all the additional control trees, FI proportion was strongly  
292 associated with the tree crop load in the previous year. The relationship between FI and tree  
293 crop load was fitted with a logistic decreasing function (Figure 2 and supplementary material  
294 Figure S2).

295 Leaf removal did not impact FI on ON trees, with values close to zero on both foliated  
296 and defoliated parts, whatever the scale at which leaf removal was performed (Figure 2, right  
297 side). In the foliated parts of the defoliated OFF trees FI proportion was similar to the control  
298 OFF trees (between 0.9 and 1, Figure 2, left side). In contrast, a strong and significant  
299 decrease in FI proportion was observed in the defoliated compared to the foliated parts of  
300 trees after leaf removal on half of the branches (-29% and -19% for 2017 and 2018  
301 respectively) or half of the tree (-74% and -63% for 2017 and 2018 respectively). Stronger  
302 decrease in the defoliated side of Y-shape trees scale than on defoliated branches was  
303 observed, suggesting an impact of the distances to the remaining leaves on FI. This distance  
304 effect was also found by the absence of any significant decrease in FI on the defoliated shoots  
305 (-6% and -10% for 2017 and 2018 respectively) of trees subjected to leaf removal at the shoot  
306 scale (Figure 2). Local fruit removal had also a strong effect on FI proportion within the tree  
307 (Figure 2 A and B, right side). FI proportions were lower in the fruiting than in the non-  
308 fruiting parts. Consistently with the distance effect observed after leaf removal treatments, FI  
309 proportion increased in non-fruiting parts compared to the fruiting ones when the distances to  
310 the remaining fruit increased. In 2018, the increase in FI proportion between fruiting and non  
311 fruiting parts was equal to 50.1% for Y-shape trees while it only reached 29% when fruit  
312 removal was performed at the shoot scale.

313 Residual values of FI proportion estimated from the logistic function (supplementary  
314 material Figure S2) were used to analyze the treatment effects with respect to the values  
315 predicted for trees under similar crop load (Table 3). This analysis allowed us to inspect the

316 effect of fruit removal treatments that directly modified the tree crop load. After fruit removal  
317 treatments, the residuals of FI proportion in spring 2017 and 2018 were significantly lower in  
318 the fruiting parts of the trees than the values predicted under similar crop load (Table 3) for  
319 fruit removal treatments at the branch scale and one side of the Y-shape tree. In contrast, FI  
320 proportion in the fruiting and non-fruiting parts was significantly higher than the predicted  
321 values for trees with similar crop load when fruit removal was performed at the shoot scale.  
322 Both together these results suggested that FI could be directly driven by the crop load at the  
323 tree scale but only when fruit load distribution within the tree is homogeneous (after fruit  
324 removal at the shoot scale).

325

326 *Mean fruit weight is affected by distances between leaves and fruit*

327 The general trend of mean fruit weight over crop loads, for the additional control trees over  
328 three years, displayed a negative relationship (Figure 3 and supplementary material Figure S3)  
329 with highest mean fruit weights equal to around 0.25kg and lowest ones to 0.08kg.

330 As for FI, mean fruit weight depended on the distances to remaining leaves in trees  
331 subjected to leaf removal (Figure 3). Indeed, mean fruit weight decreased of 53% and 59% in  
332 the defoliated parts of trees subjected to leaf removal at the branch scale or on half of Y-  
333 Shape trees, respectively compared to the foliated parts. Conversely, this decrease was no  
334 longer significant (equal to 2%) when defoliation was performed at the shoot scale. In both  
335 foliated and defoliated parts of these trees (defoliation at the shoot scale), mean fruit weight  
336 was not significantly different to what observed for control ON trees. Fruit removal increased  
337 mean fruit weight compared to control ON trees. Nevertheless, this increase was higher when  
338 fruit removal was performed at the branch scale or on one side of Y-Shape trees than after  
339 fruit removal at the shoot scale.

340 The analysis of residuals to relationship between crop load and mean fruit weight  
341 (Table 3) showed that the mean fruit weight in the fruiting shoots (2016) and branches (2016

342 and 2017) after fruit removal treatments was similar to that of control trees with similar crop  
343 load and with a homogeneous distribution of fruit within the tree. A slight increase in residual  
344 values (around +0.02 kg) was observed when fruit removal was performed on one side of the  
345 Y shape trees in both years or on half of the shoots in 2017. These results suggest that fruit  
346 weight was mainly determined by the tree crop load whatever the distance to remaining fruits  
347 after fruit removal.

348

349 *Relationships between FI and mean fruit weight variability and carbon availability.*

350 Photosynthesis rate was higher for ON trees compared to OFF ones (mean values 7.6 and 14.3  
351  $\mu\text{mol}\cdot\text{m}^{-2}\cdot\text{s}^{-1}$  for OFF and ON control trees, respectively; Figure 4). Moreover, no significant  
352 difference in photosynthetic rates (mean value  $15.76 \mu\text{mol}\cdot\text{m}^{-2}\cdot\text{s}^{-1}$  for all fruit removal  
353 treatment) was observed between the different fruiting and non-fruiting parts of trees  
354 subjected to fruit removal. This suggests that fruit presence stimulated photosynthesis  
355 whatever the distances to the fruit.

356 Starch concentration varied among organs, with low values in SAM and leaves (Figure  
357 5 A, B) and higher values in stems and wood (Figure 5 C, D). Tree crop load negatively  
358 affected starch concentration in leaves, stem and wood but had no effect on starch  
359 concentration in SAM. (Figure 5 B) with similar values between ON and OFF trees. In OFF  
360 trees, no impact of defoliation treatments was observed on starch concentrations in SAM,  
361 stems and wood (Figure 5, left sides), although a decrease in FI proportion was observed in  
362 defoliated parts of OFF trees. In contrast, in ON trees, significantly higher starch  
363 concentration were found in the SAM, stems and wood when comparing the leafy parts to  
364 defoliated ones (Figure 5 B, C, D). For these trees, this effect of leaf removal was similar  
365 regardless of the distances to the remaining leaves since no difference was observed between  
366 defoliation at the shoot, branch or half tree scale. The effect of fruit removal on starch

367 concentration was observed in wood only, through a greater concentration in the non-fruiting  
368 than in the fruiting parts of defoliated shoot, branch and one side of the Y-shape tree  
369 treatments (Figure 5D). No clear impact of the distances to the remaining fruit was observed  
370 on starch concentrations in wood, as the decrease in starch content were similar whatever the  
371 scale at which fruit removal was performed.

372         Regarding, the soluble sugars content (sorbitol, sucrose, fructose and glucose) in SAM  
373 (supplementary material Figure 4), sorbitol displayed higher concentrations than the three  
374 other sugars. Moreover, treatment effects (fruit and leaf removal) on soluble sugars content in  
375 SAM were observed on sorbitol concentration, only after leaf removal treatments on both  
376 OFF and ON trees.

377

378 *GA9 (precursor of active form) and GA1 (active form) decrease in fruit presence*

379 In the early-13-hydroxylating pathway (supplementary material Figures S5 and S6), three  
380 forms were found in abundance (Table 4): GA44 (inactive form), GA1 (active form), and  
381 GA8 (degradation form). In the non-hydroxylating GA pathway, maximal GA concentrations  
382 were found for GA9 (Table 4) which is the last inactive form before GA4 synthesis.  
383 Variations in SAM GA contents were observed among all the sampled trees (supplementary  
384 material Figure S6). Nevertheless, differences were significant between SAM from fruiting  
385 and non-fruiting parts of trees. GA9 concentration was significantly higher in the SAM  
386 collected on the non-fruiting trees or parts of trees (gathering control OFF trees and in non-  
387 fruiting branches and sides of Y-shape trees) than in those collected on fruiting trees or parts  
388 of trees (gathering control ON trees, fruiting branches and sides of Y-shape trees) (Table 4).  
389 Even though not significant, higher concentration was observed in the non-fruiting side of the  
390 Y-shape tree than in the non-fruiting branches, suggesting a possible effect of distances to the  
391 remaining fruit. In addition, a slightly higher but non-significant GA1 concentration was



392 observed in the SAM of non-fruiting parts of the trees than in the fruiting ones. Conversely,  
393 GA8 concentration was higher in control ON than in control OFF trees and in fruiting than in  
394 non-fruiting branches when fruit removal was performed on half of the branches.  
395 Nevertheless, no difference between fruiting and non-fruiting branches was observed for the  
396 Y-Shape trees. Finally, leaf removal did not influence any GA concentration.

397

## 398 **Discussion**

399

### 400 *Relative roles of carbohydrates and GA in flower induction*

401 Our study investigated the impact of the tree carbon balance on floral induction by exploring  
402 the relation between NSC contents in all the organs and SAM status (floral induced or not)  
403 after organ manipulations (leaf or fruit removal). After defoliation treatments, the decrease in  
404 FI proportion in the defoliated branches and half-side of OFF trees was not associated with  
405 any decrease in starch content in all organs including SAM (Figures 5). In addition, NSC  
406 concentration, whatever the forms (soluble or starch), did not vary between fruiting and non-  
407 fruiting parts in all the organs including SAM (Figures 5 and S4), while a decrease in FI was  
408 observed in fruiting parts compared to non-fruiting parts. Together these results on trees  
409 subjected to leaf or fruit removal suggest that FI is not only related to the tree carbon balance  
410 and carbohydrate availability in SAM.

411 Other possible effects of leaf removal independently of the carbon production and  
412 primary metabolism (here analyzed through NSC and starch content) could be implicated.  
413 Indeed, leaves are likely to be sources of FT protein, considered as the florigen which is  
414 transported to SAM where it activates flowering (Corbesier and Coupland, 2006; Hanke *et al.*,  
415 2007). Nevertheless, other carbohydrates than starch and NSC may have role in FI, especially  
416 signaling molecules such as trehalose-6-phosphate (T6P, Ponnu *et al.*, 2011; Lastdrager *et al.*,  
417 2014). In *Arabidopsis* T6P has been shown to affect flowering, by inducing FT production

418 and the expression of flowering-time (SPL) genes in SAM that in turn regulate flowering as a  
419 function of plant age (Wahl *et al.*, 2013).

420 Moreover, GA4 has been shown to target key flowering genes in SAM, in *Arabidopsis*  
421 (Eriksson *et al.*, 2006). In apple tree, GA4 and GA1 may inhibit FI (Ramírez *et al.*, 2001;  
422 Ramírez *et al.*, 2004). In the present study, the inactive GA9 preceding GA4 in the non-  
423 hydroxylating pathway accumulated in OFF trees, and in non-fruiting branches and side of Y-  
424 shape trees (supplementary material Figure S5). Nevertheless, no difference in GA4  
425 concentrations was found in SAM between fruiting and non-fruiting conditions. In addition,  
426 in the hydroxylating pathway, GA1 was slightly higher in non-fruiting tree parts and in OFF  
427 trees (supplementary material Figure S5) whereas GA8 slightly accumulated in fruit presence.  
428 Altogether these results are consistent with the down-regulation of *MdGA2ox* transcripts in  
429 OFF trees (or its up-regulation in ON trees), observed in Guitton *et al.*, (2016). They suggest  
430 that the last steps of GA catabolism could be less active in absence of fruit (conversely more  
431 active in presence of fruit). Therefore, the putative role of GA on controlling FI is supported  
432 by our results and previous findings even though their inhibitory or activating effect remains  
433 to be clarified. Moreover, further researches would be needed to investigate the ability of  
434 GAs, likely produced by seeds (Dennis and Nitsch, 1966), to directly act on SAM FI in the  
435 apple tree.

436

#### 437 *Response of floral induction and fruit growth to changing source-sink distances*

438 In this study, leaf and fruit removal at different scales of plant organization allowed us to  
439 clarify the impact of distances between organs on FI and fruit growth. Similar FI proportion  
440 was observed between foliated and defoliated shoots and between fruiting and non-fruiting  
441 ones when leaf or fruit removal was performed at the shoot scale, thus implying transport at  
442 short distances of signals originated from leaves (activators) and fruits (inhibitors). This

443 suggests that shoots can be considered as non-autonomous and prone to exchanges of  
444 inhibiting/activating signals.

445 In contrast, leaf presence in the foliated parts of trees subjected to defoliation at the  
446 branch scale or on one side of Y-Shape trees did not promoted FI in the defoliated parts of  
447 these trees. In that case, distances were too long, possibly for florigen transport, consistently  
448 with previous studies having underlined the lack of evidence of FT long distance transport in  
449 woody plants (Putterill and Varkonyi-Gasic, 2016). Similarly, FI was only slightly affected by  
450 fruit presence at long distance since FI in the non-fruiting branches or sides of Y-Shape trees  
451 was slightly lower or even similar to that observed on OFF trees. This suggests that the  
452 inhibiting signal produced by fruits may not be transported at long distances in the tree  
453 structure or in low quantity, only. GA transport at relatively long distances has been  
454 demonstrated in small annual plants, with GA20 being the mobile form in *Pisum sativum*  
455 (Binenbaum *et al.*, 2018) and GA12 the form transported through the xylem in *Arabidopsis*  
456 *thaliana* (Regnault *et al.*, 2015). Interestingly, the different GA forms issuing from the  
457 hydroxylated and non-hydroxylated pathways may involve different transporters (Binenbaum  
458 *et al.*, 2018). However, studies on the transport of these forms and the distances at which they  
459 could be transported in more complex plants such as in fruit trees are still needed.

460 Fruit weight was also strongly affected by the distances to the remaining leaves after  
461 leaf removal. As for FI, similar fruit weights were observed between neighboring leafy and  
462 non-leafy shoots, when defoliations were performed at shoot scale. This is consistent with  
463 previous studies on peach where non-fruiting shoots contributed to fruit growth in nearby  
464 fruiting shoots (Walcroft *et al.*, 2004). Conversely, a strong decrease in fruit weight and starch  
465 concentrations in all organs were observed on defoliated branches or defoliated parts of Y-  
466 Shape trees. This is in accordance with previous studies of carbon labeling on young walnut  
467 and peach trees, that have shown limitation of carbon transport at long distance leading to

468 almost complete autonomy of branches even when exposed to source limitation through  
469 shading, leaf removal or girdling (Lacointe *et al.*, 2004; Volpe *et al.*, 2008). These results are  
470 also consistent with leaf removal effect on fruit growth and reserve accumulation in young  
471 fuyu trees and mature *Carpinus*, *Fagus* and *Tilia* forest trees (Choi *et al.*, 2003; Hoch, 2005).

472         Conversely, long distance transport of carbohydrates was suggested by the results after  
473 fruit removal. Indeed, mean fruit weight in the fruiting parts of trees subjected to fruit removal  
474 was similar or even higher to that observed in control trees with a homogeneous crop load  
475 (Table 3). Moreover, starch concentration in stems and leaves of non-fruiting parts of ON  
476 trees (Figure 5D) was lower than that observed in OFF trees suggesting carbohydrate export  
477 to the fruiting parts of the trees even at long distances to sustain fruit growth. Nevertheless, it  
478 is noticeable that a part of the carbon excess produced in the non-fruiting parts was allocated  
479 to the reserve organs. This confirms the major role of reserves as an active sink in perennial  
480 tress (Silpi *et al.*, 2007). The low NSC content observed in leaves of the non-fruiting parts can  
481 be interpreted as resulting from carbon export and prevented photosynthesis inhibition by  
482 starch accumulation (Wunsche *et al.*, 2000), thus leading to a similar photosynthesis rate in  
483 fruiting and non-fruiting parts of the trees (Figure 4).

484         A discrepancy on the distance effects on fruit growth between trees subjected to leaf  
485 and fruit removal may appear from our results. However, this apparent discrepancy results  
486 from the nature of each treatment. First, leaf removal likely affected the transpiration flux  
487 (e.g. Pataki *et al.*, 1998) and may have disturbed the long distance transport of carbohydrates  
488 (e.g. Hölttä *et al.*, 2009, Nikinmaa *et al.*, 2013). Second, large within tree source-sink  
489 imbalances existed in the trees subjected to fruit removal with the non-fruiting parts  
490 displaying low sink demand and large carbohydrate supply and the fruiting parts displaying  
491 high sink demand. This imbalance could be the driver of carbon fluxes even at long distance  
492 while in the trees subjected to leaf removal fruit sink demand remained high in all the tree

493 parts thus limiting carbon fluxes from the remaining leaves to the distant fruit (Walcroft *et al.*,  
494 2004).

495

## 496 **Conclusion**

497

498 Our results shows that SAM floral induction is not directly associated to the tree carbon  
499 balance nor organ starch content and NSC availability in SAM but more probably to the  
500 combination of activating and inhibiting signals originated from leaves and fruit. Having  
501 performed leaf and fruit removal at different scales of tree organization provides new clues  
502 for understanding the distances at which these signal can act within the plant. At short  
503 distances (neighboring shoots), these signals are able to move from sources (leaves and fruit)  
504 to sinks (SAM) to act on FI while they cannot reach SAM at longer distances (branches and  
505 sides of Y-shape trees). Moreover, this study suggests that carbohydrates can move at longer  
506 distances from branch to branch in condition of high source-sink imbalances within the tree  
507 and in absence of any perturbation of the vascular fluxes. Finally, this study brings new  
508 considerations on carbohydrate and hormone transports within the fruit trees that can be then  
509 integrated in functional structural plant model (e.g Vos *et al.*, 2009) to simulate floral  
510 induction and fruit growth over years.

511

## 512 **Aknowledgments**

513

514 The authors thank the AFEF team, SudExpé for technical support during experiments, UMR  
515 PIAF for having provided LICOR 6400 device, CIRAD biochemistry platform for NSC  
516 analyses and IBMCP for GA quantification. The authors also thanks Dr. B. Guitton for his  
517 implication in the gibberellins results analysis. This work was funded by the ANR-DFG

518 Alternapp project and by the PhD grant accorded to F. Belhassine by INRA BAP department  
519 and ITK.

520

521

## 522 **References**

523 **Barthélémy D, Caraglio Y.** 2007. Plant architecture: A dynamic, multilevel and  
524 comprehensive approach to plant form, structure and ontogeny. *Annals of Botany* **99**, 375–  
525 407.

526 **Berman ME, Dejong TM.** 2003. Seasonal patterns of vegetative growth and competition  
527 with reproductive sinks in peach (*Prunus persica*). *Journal of Horticultural Science and*  
528 *Biotechnology* **78**, 303–309.

529 **Binenbaum J, Weinstain R, Shani E.** 2018. Gibberellin Localization and Transport in  
530 Plants. *Trends in Plant Science* **23**, 410–421.

531 **Castillo-Llanque F, Rapoport HF.** 2011. Relationship between reproductive behavior and  
532 new shoot development in 5-year-old branches of olive trees (*Olea europaea* L.). *Trees -*  
533 *Structure and Function* **25**, 823–832.

534 **Chan BG, Cain JC.** 1967. The effect of seed formation on subsequent flowering in apple.  
535 *Proceedings of the American Society for Horticultural Science* **91**, 63–68.

536 **Choi ST, Park DS, Song WD, Kang SM, Shon GM.** 2003. Effect of different degrees of  
537 defoliation on fruit growth and reserve accumulation in young ‘Fuyu’ trees. *Acta*  
538 *Horticulturae* **601**, 99–104.

539 **Corbesier L, Coupland G.** 2006. The quest for florigen: a review of recent progress. *Journal*  
540 *of experimental botany* **57**, 3395–3403.

- 541 **Costes E, Crespel L, Denoyes B, Morel P, Demene M-N, Lauri P-E, Wenden B.** 2014.  
542 Bud structure, position and fate generate various branching patterns along shoots of closely  
543 related Rosaceae species: a review. *Frontiers in Plant Science* **5**, 1–11.
- 544 **Costes E, Sinoquet H, Kelner JJ, Godin C.** 2003. Exploring within-tree architectural  
545 development of two apple tree cultivars over 6 years. *Annals of Botany* **91**, 91–104.
- 546 **DeJong TM, Grossman YL.** 1995. Quantifying sink and source limitations on dry matter  
547 partitioning to fruit growth in peach trees. *Physiologia Plantarum* **95**, 437–443.
- 548 **Dennis FG, Neilsen JC.** 1999. Physiological factors affecting biennial bearing in tree fruit:  
549 The role of seeds in apple. *HortTechnology* **9**, 317–322.
- 550 **Dennis F, Nitsch P.** 1966. © 1966 Nature Publishing Group. *Nature* **211**, 781–782.
- 551 **Escobar-Gutiérrez. A J GJ.** 1996. Distribution , métabolisme et rôle du sorbitol chez les  
552 plantes supérieures . Synthèse To cite this version □: HAL Id □: hal-00885795.
- 553 **Foster T, Johnston R, Seleznyova A.** 2003. A morphological and quantitative  
554 characterization of early floral development in apple (*Malus x domestica* Borkh.). *Annals of*  
555 *Botany* **92**, 199–206.
- 556 **Francesconi AHD, Lakso AN, Nyrop JP, Barnard J, Denning SS.** 1996. Carbon balance as  
557 a physiological basis for the interactions of European red mite and crop load on ‘Starkrimson  
558 Delicious’ apple trees. *Journal of the American Society for Horticultural Science* **121**, 959–  
559 966.
- 560 **Grossman YL, Dejong T.** 1998. training and pruning sysytem effects on vegetative growth  
561 potential, light interception, and cropping efficiency in peach trees. *J. Amer. Soc. Hort. Sci*  
562 **123**, 1058–1064.
- 563 **Grossman YL, DeJong TM.** 1995. Maximum fruit growth potential following resource

- 564 limitation during peach growth. *Annals of Botany* **75**, 561–567.
- 565 **Guitton B, Kelner JJ, Celton JM, Sabau X, Renou JP, Chagné D, Costes E.** 2016.
- 566 Analysis of transcripts differentially expressed between fruited and deflowered ‘Gala’ adult
- 567 trees: A contribution to biennial bearing understanding in apple. *BMC Plant Biology* **16**, 1–
- 568 22.
- 569 **Haberman A, Ackerman M, Crane O, Kelner JJ, Costes E, Samach A.** 2016. Different
- 570 flowering response to various fruit loads in apple cultivars correlates with degree of transcript
- 571 reaccumulation of a TFL1-encoding gene. *The Plant journal* □: for cell and molecular biology
- 572 **87**, 161–173.
- 573 **Hanke M-V, Flachowsky H, Peil A, Ha □ttasch C.** 2007. No Flower no Fruit – Genetic
- 574 Potentials to Trigger Flowering in Fruit Trees. *Genes, Genomes and Genomics* **1**, 1–20.
- 575 **Hansen P.** 1967. 14C □ Studies on Apple Trees III. The Influence of Season on Storage and
- 576 Mobilization of Labelled Compounds. *Physiologia Plantarum* **20**, 1103–1111.
- 577 **Hansen P.** 1977. Carbohydrate allocation. In: *Environmental Effects on Crop Physiology*
- 578 (Ed. by J. J. Landsberg & C. V. Cutting). Academic Press, London. pp. 247-258.
- 579 **Hoch G.** 2005. Fruit-bearing branchlets are carbon autonomous in mature broad-leaved
- 580 temperate forest trees. *Plant, Cell and Environment* **28**, 651–659.
- 581 **Hölttä T, Mencuccini M, Nikinmaa E.** 2009. Linking phloem function to structure: Analysis
- 582 with a coupled xylem-phloem transport model. *Journal of Theoretical Biology* **259**, 325–337.
- 583 **Jung C, Pillen K, Staiger D, Coupland G, von Korff M.** 2017. Editorial: Recent Advances
- 584 in Flowering Time Control. *Frontiers in Plant Science* **7**, 2016–2018.
- 585 **Kandiah S.** 1979a. Turnover of carbohydrates in relation to growth in apple trees. I. Seasonal
- 586 variation of growth and carbohydrate reserves. *Annals of Botany* **44**, 175–183.



- 587 **Kandiah S.** 1979*b*. Turnover of Carbohydrates in Relation to Growth in Apple Trees. II.  
588 Distribution of <sup>14</sup>C Assimilates Labelled in Autumn, Spring and Summer. *Annals of Botany*  
589 **44**, 185–195.
- 590 **Lacointe A, Deleens E, Ameglio T, Saint-Joanis B, Lelarge C, Vandame M, Song GC,**  
591 **Daudet FA.** 2004. Testing the branch autonomy theory: A <sup>13</sup>C/<sup>14</sup>C double-labelling  
592 experiment on differentially shaded branches. *Plant, Cell and Environment* **27**, 1159–1168.
- 593 **Lastdrager J, Hanson J, Smeekens S.** 2014. Sugar signals and the control of plant growth  
594 and development. *Journal of Experimental Botany* **65**, 799–807.
- 595 **Massonnet C, Costes E, Rambal S, Dreyer E, Regnard JL.** 2007. Stomatal regulation of  
596 photosynthesis in apple leaves: Evidence for different water-use strategies between two  
597 cultivars. *Annals of Botany* **100**, 1347–1356.
- 598 **Monselise SP, Goldschmidt EE.** 1982. Alternate bearing in fruit trees. *Horticultural Reviews*  
599 **4**, 128–173.
- 600 **Nakagawa M, Honsho C, Kanzaki S, Shimizu K, Utsunomiya N.** 2012. Isolation and  
601 expression analysis of FLOWERING LOCUS T-like and gibberellin metabolism genes in  
602 biennial-bearing mango trees. *Scientia Horticulturae* **139**, 108–117.
- 603 **Naschitz S, Naor A, Genish S, Wolf S, Goldschmidt EE.** 2010. Internal management of  
604 non-structural carbohydrate resources in apple leaves and branch wood under a broad range of  
605 sink and source manipulations. *Tree Physiology* **30**, 715–727.
- 606 **Nikinmaa E, Hölttä T, Hari P, Kolari P, Mäkelä A, Sevanto S, Vesala T.** 2013. Assimilate  
607 transport in phloem sets conditions for leaf gas exchange. *Plant, Cell and Environment* **36**,  
608 655–669.
- 609 **Pallas B, Bluy S, Ngao J, Martinez S, Clément-Vidal A, Kelner J-J, Costes E.** 2018.

- 610 Growth and carbon balance are differently regulated by tree and shoot fruiting contexts: an  
611 integrative study on apple genotypes with contrasted bearing patterns. *Tree Physiology*, 1–14.
- 612 **Palmer JW, CAI Y-L, EDJAMO Y.** 1991. Effect of part-tree flower thinning on fruiting,  
613 vegetative growth and leaf photosynthesis in ‘Cox’s Orange Pippin’ apple. *Journal of*  
614 *Horticultural Science* **66**, 319–325.
- 615 **Pataki DE, Oren R, Phillips N.** 1998. Pataki et al - Responses of sap flux and stomatal  
616 conductance of Pinus taeda trees to stepwise reductions in leaf area. **49**, 871–878.
- 617 **Putterill J, Varkonyi-Gasic E.** 2016. FT and florigen long-distance flowering control in  
618 plants. *Current Opinion in Plant Biology* **33**, 77–82.
- 619 **Ramírez H, Benavides A, Robledo V, Alonso R, Gómez J.** 2004. Gibberellins and  
620 cytokinins related to fruit bud initiation in apple. *Acta Horticulturae* **636**, 409–413.
- 621 **Ramírez H, Hoad G V, Benavides A, Rangel E, Ramírez H, Hoad G V, Benavides A,**  
622 **Rangel E.** 2001. Gibberellins in apple seeds and the transport of [ 3 H ] -GA 4. **45**, 47–50.
- 623 **Regnault T, Davière J-M, Wild M, Sakvarelidze-Achard L, Heintz D, Carrera Bergua E,**  
624 **Lopez Diaz I, Gong F, Hedden P, Achard P.** 2015. The gibberellin precursor GA12 acts as  
625 a long-distance growth signal in Arabidopsis. *Nature Plants* **1**, 15073.
- 626 **Rolland F, Baena-Gonzalez E, Sheen J.** 2006. SUGAR SENSING AND SIGNALING IN  
627 PLANTS: Conserved and Novel Mechanisms. *Annual Review of Plant Biology* **57**, 675–709.
- 628 **Sachs T.** 1999. ‘Node counting’: An internal control of balanced vegetative and reproductive  
629 development. *Plant, Cell and Environment* **22**, 757–766.
- 630 **Sala A, Woodruff DR, Meinzer FC.** 2012. Carbon dynamics in trees: Feast or famine? *Tree*  
631 *Physiology* **32**, 764–775.

- 632 **Silpi U, Lacoïnte A, Kasempsap P, Thanysawanyangkura S, Chantuma P, Gohet E,**  
633 **Musigamart N, Clément A, Améglio T, Thaler P.** 2007. Carbohydrate reserves as a  
634 competing sink: Evidence from tapping rubber trees. *Tree Physiology* **27**, 881–889.
- 635 **Sprugel DG.** 2002. When branch autonomy fails: Milton’s Law of resource availability and  
636 allocation. *Tree physiology* **22**, 1119–1124.
- 637 **Sprugel DG, Hinckley TM, Schaap W.** 1991. The Theory and Practice of Branch  
638 Autonomy. *Annual Review of Ecology and Systematics* **22**, 309–334.
- 639 **Teo G, Suzuki Y, Uratsu SL, Lampinen B, Ormonde N, Hu WK, DeJong TM, Dandekar**  
640 **AM.** 2006. Silencing leaf sorbitol synthesis alters long-distance partitioning and apple fruit  
641 quality. *Proceedings of the National Academy of Sciences of the United States of America*  
642 **103**, 18842–7.
- 643 **Volpe G, Lo Bianco R, Rieger M.** 2008. Carbon autonomy of peach shoots determined by  
644 (13)C-photoassimilate transport. *Tree physiology* **28**, 1805–1812.
- 645 **Vos J, Evers JB, Buck-Sorlin GH, Andrieu B, Chelle M, De Visser PHB.** 2009.  
646 Functional-structural plant modelling: A new versatile tool in crop science. *Journal of*  
647 *Experimental Botany* **61**, 2101–2115.
- 648 **Wahl V, Ponnu J, Schlereth A, Arrivault S, Langenecker T, Franke A, Feil R, Lunn JE,**  
649 **Stitt M, Schmid M.** 2013. *Regulation of Flowering by Trehalose-6-Phosphate Signaling in*  
650 *Arabidopsis thaliana*.
- 651 **Walcroft a S, Lescourret F, Génard M, Sinoquet H, Le Roux X, Donès N.** 2004. Does  
652 variability in shoot carbon assimilation within the tree crown explain variability in peach fruit  
653 growth? *Tree physiology* **24**, 313–322.
- 654 **Wilkie JD, Sedgley M, Olesen T.** 2008. Regulation of floral initiation in horticultural trees.

655 Journal of Experimental Botany **59**, 3215–3228.

656 **Wilson RN, Heckman JW, Somerville CR.** 1992. Gibberellin Is Required for Flowering in

657 *Arabidopsis thaliana* under Short Days. Plant Physiology **100**, 403–408.

658 **Wunsche JN, Palmer JW, Greer DH.** 2000. Effects of crop load on fruiting and gas-

659 exchange characteristics of 'Braeburn'/M.26 apple trees at full canopy. Journal of the

660 American Society for Horticultural Science **125**, 93–99.

661

## 662 **Figure captions**

663

664

665 **Figure 1.** Schematic representation of the leaf and fruit removal treatments.

666

667

668 **Figure 2.** Relationship between FI proportion and tree crop load (number of fruit per trunk

669 cross sectional area) in ON and OFF 'Golden Delicious' apple trees for the different

670 treatments in 2017 (A) and 2018 (B). Each point represents the value for one combination

671 of tree treatments, tree scale at which treatments were performed and conditions within the

672 trees (leaf or fruit presence) and bars represent the standard deviation among measurements

673 (3 measurements for each treatment combination). The continuous line represents the

674 logistic function fitted on the additional tree dataset ( $y = \exp(-0.3008 \times x + 2.6341) / (1 +$

675  $\exp(-0.3008 \times x + 2.6341))$ ) (see supplementary material S2). The dotted grey lines

676 represent the deviation interval of the fitted values. The dataset was fitted with a glm model

677 (binomial family) and leaf and fruit presence effect was assessed with one-way-ANOVA.

678 \*\*\* significant at  $P < 0.001$ . A Tukey's HSD test for pairwise comparisons was made after

679 the analysis and different letters indicate statistically different values among all conditions.

680

681 **Figure 3.** Relationship between mean fruit weight and crop load in ON ‘Golden Delicious’  
682 apple trees for the different treatment combinations in 2016 (A) and 2017 (B). Each point  
683 represents the value for one combination of tree treatments, tree scale at which treatments  
684 were performed and condition within the trees (leaf or fruit presence) and bars represent the  
685 standard deviation among measurements (3 measurements for each treatment combination).  
686 The continuous black line represents the exponential function fitted on the additional trees  
687 dataset ( $Y = 0.5 \times \exp(-0.2 \times x) + 0.06$ ) (supplementary material Figure S3). The dotted  
688 grey lines represent the deviation interval of the fitted values. Leaf and fruit presence effect  
689 was estimated with a one-way-ANOVA. \*\*\* significant at  $P < 0.001$ . A Tukey’s HSD test  
690 for pairwise comparisons was made after the analysis and different letters indicate  
691 statistically different values among all combinations.

692

693 **Figure 4.** Boxplot representation of leaf photosynthetic activity in August 2017 for ‘Golden  
694 Delicious’ apple trees for the different treatments (control, leaf removal, and fruit removal),  
695 tree scales (tree, shoot, branch, and one side of Y-shape trees) at which treatments were  
696 performed and conditions within the tree (foliated, defoliated, fruiting and non-fruiting) for  
697 ON and OFF trees. Nine replicates were used for each treatment combinations (3 samples  $\times$   
698 3 trees). Treatment effect was estimated with a one-way-ANOVA considering all the  
699 combinations together. \*\*\* significant at  $P < 0.001$ . A Tukey’s HSD test for pairwise  
700 comparisons was made after the analysis and different letters indicate statistically different  
701 values.

702

703 **Figure 5.** Boxplot representation of starch concentration in the leaves (A), shoot apical

704 meristems (B), stems (C) and one-year-old wood (D) of ON and OFF ‘Golden Delicious’  
705 apple trees for the different treatments, tree scales at which treatments were performed and  
706 conditions within the trees (leaf or fruit presence). Nine replicates were used for each  
707 treatment combinations (3 samples × 3 trees). Treatment effect was estimated with a one-  
708 way-ANOVA considering all the combinations together. \*\*\* significant at P<0.001. A  
709 Tukey’s HSD test for pairwise comparisons was made after the analysis and different  
710 letters indicate statistically different values among all treatments.

711

## 712 **Supplementary material**

713

714 **Figure S1.** Representation of the gibberellins biosynthesis pathways.

715

716 **Figure S2.** Relationship between crop load and FI proportion for the additional control trees.

717

718 **Figure S3.** Relationship between crop load and mean fruit weight for the additional control  
719 trees.

720

721 **Figure S4.** Sorbitol, sucrose, fructose and glucose concentrations in shoot apical  
722 meristems.

723

724 **Figure S5.** Boxplot representation of concentrations of all gibberellin forms (ng.g<sup>-1</sup>) in shoot  
725 apical meristems.

726

727 **Figure S6.** Distribution of concentrations of the GA9, 44, 1 and 8 in the two biosynthesis  
728 pathways in shoot apical meristems.

729

730

731

732

733

734

735

736

737

738 **Table 1:** Mean and standard deviation (sd) values of crop load estimated as the fruit number per trunk  
 739 cross sectional area (fruit.cm<sup>-2</sup>) for different treatments and scales at which treatments were performed  
 740 for the control ON trees of ‘Golden delicious’ apple cultivar in 2016 and 2017.

| Tree treatment   | Scale     | Year               |     |                    |     |
|------------------|-----------|--------------------|-----|--------------------|-----|
|                  |           | 2016               |     | 2017               |     |
|                  |           | Mean value         | sd  | Mean               | sd  |
| Control ON       | Tree      | 12,1 <sup>a</sup>  | 3.0 | 20,7 <sup>ab</sup> | 7.0 |
|                  | Shoot     | 13,2 <sup>a</sup>  | 1.1 | 13,6 <sup>ab</sup> | 0.8 |
| Leaf removal     | Branch    | 14,0 <sup>a</sup>  | 1.9 | 16,3 <sup>ab</sup> | 1.9 |
|                  | Half-tree | 9,6 <sup>ab</sup>  | 1.3 | 18,7 <sup>a</sup>  | 8.8 |
| Fruit removal    | Shoot     | 8,5 <sup>ab</sup>  | 2.9 | 15,9 <sup>ab</sup> | 5.3 |
|                  | Branch    | 6,8 <sup>b</sup>   | 2.4 | 8,2 <sup>b</sup>   | 0.2 |
|                  | Half-tree | 9,98 <sup>ab</sup> | 4.9 | 12,2 <sup>b</sup>  | 1.9 |
| Treatment effect |           | *                  |     | **                 |     |

741

742 *Treatment effect was estimated with a one-way ANOVA on three trees for each combination of treatment*  
 743 *and scale at which treatment was performed. \*\* significant at 0.001<P<0.01 and \* significant at*  
 744 *0.01<P<0.05. A Tukey’s HSD test for pairwise comparisons was made after ANOVA and different*  
 745 *letters in a column indicate statistically different values among all treatments.*

746

747

748

749

750

751

752

753

754

755

756

757 **Table 2:** Proportion of shoot apical meristems (SAM) induced to flower in ‘Golden delicious’ apple  
 758 trees subjected to complete fruit removal performed sequentially from 30 to 70 days after full bloom  
 759 (DAFB), in 2016 and 2017 and for control OFF and ON trees. FI proportions were evaluated based on  
 760 the floral bud proportion, as the ratio of the total number of reproductive buds to the total number of  
 761 growing buds, on six branches per tree, in the next spring, after the year of treatment.

762

| Treatment     | Floral induction 2017      |               | Floral induction 2018      |               |
|---------------|----------------------------|---------------|----------------------------|---------------|
|               | Date of fruit removal 2016 | FI proportion | Date of fruit removal 2017 | FI proportion |
|               | (DAFB)                     |               | (DAFB)                     |               |
| Control OFF   | -                          | 97%           | -                          | 100%          |
| Fruit removal | 30                         | 95%           | -                          | -             |
|               | 36                         | 79%           | 37                         | 98%           |
|               | 42                         | 70%           | 43                         | 100%          |
|               | 50                         | 76%           | 50                         | 90%           |
|               | 56                         | 40%           | 58                         | 56%           |
|               | 70                         | 18%           | -                          | -             |
| Control ON    | -                          | 19%           | -                          | 29%           |

763

764

765



766

767

768

769

770

771 **Table 3:** Mean values of residuals extracted from non-linear adjustments between the mean fruit weight (kg) or FI proportion and tree crop loads on ‘Golden  
 772 delicious’ apple trees. Data are presented for different treatments and scales at which treatments were performed and depending on leaf or fruit removal  
 773 conditions.

| Tree treatments  | Scale     | Mean fruit weight residuals |                              | FI proportion residuals      |                              |                               |
|------------------|-----------|-----------------------------|------------------------------|------------------------------|------------------------------|-------------------------------|
|                  |           | Leaf/fruit presence         | 2016                         | 2017                         | 2017                         | 2018                          |
| Leaf removal     | Shoot     | Foliated                    | -                            | 0.027 <sup>de</sup> (***)    | -0.061 <sup>ab</sup>         | -0.014 <sup>b</sup>           |
|                  |           | Defoliated                  | -                            | 0.027 <sup>de</sup> (***)    | -0.053 <sup>ab</sup>         | -0.077 <sup>bc</sup>          |
|                  | Branch    | Foliated                    | -0.014 <sup>b</sup>          | -0.004 <sup>bcd</sup>        | -0.031 <sup>ab</sup>         | +0.030 <sup>b</sup>           |
|                  |           | Defoliated                  | -0.067 <sup>c</sup><br>(***) | -0.047 <sup>e</sup><br>(***) | -0.198 <sup>b</sup><br>(***) | -0.100 <sup>bc</sup><br>(*)   |
|                  | Half-tree | Foliated                    | +0.011 <sup>ab</sup> (*)     | -0.003 <sup>bc</sup>         | -0.045 <sup>ab</sup>         | +0.060 <sup>ab</sup>          |
|                  |           | Defoliated                  | -0.052 <sup>c</sup><br>(***) | -0.044 <sup>e</sup><br>(***) | -0.449 <sup>c</sup><br>(***) | -0.329 <sup>d</sup><br>(***)  |
| Fruit removal    | Shoot     | Fruiting                    | -0.002 <sup>ab</sup>         | +0.013 <sup>ab</sup> (*)     | -                            | +0.213 <sup>ab</sup><br>(*)   |
|                  |           | Non-fruiting                | -                            | -                            | -                            | +0.372 <sup>a</sup><br>(***)  |
|                  | Branch    | Fruiting                    | +0.001 <sup>ab</sup>         | +0.001 <sup>abc</sup>        | -0.173 <sup>b</sup><br>(***) | -0.293 <sup>cd</sup><br>(***) |
|                  |           | Non-fruiting                | -                            | -                            | -0.135 <sup>b</sup><br>(**)  | +0.103 <sup>ab</sup>          |
|                  | Half-tree | Fruiting                    | +0.029 <sup>a</sup><br>(***) | +0.021 <sup>a</sup><br>(***) | -0.486 <sup>c</sup><br>(***) | -0.414 <sup>d</sup><br>(***)  |
|                  |           | Non-fruiting                | -                            | -                            | +0.027 <sup>a</sup>          | +0.017 <sup>b</sup>           |
| Treatment effect |           |                             | ***                          | ***                          | ***                          | ***                           |

774 Stars between parentheses indicate when residuals were significantly different from 0 (expected value estimated for the general relationship, Supplementary  
 775 Figures S8 and S9). Treatment effects were estimated for all the conditions with a one-way ANOVA. \*\*\* significant at  $P < 0.001$ . \*\* significant at

776 *0.001<P<0.01 and \* significant at 0.01<P<0.05. A Tukey's HSD test for pairwise comparisons was made after ANOVA and different letters in a column*  
777 *indicate statistically different values among all treatments (leaf and fruit removal).*

778

779

780

781

782

783

784

785

786

787

788

789

790

791

792

793 **Table 4:** Concentrations (ng.g<sup>-1</sup>) of GA9, 44, 1 and 8 in shoot apical meristems sampled at 58 days after full bloom on ‘Golden Delicious’ apple trees under  
 794 different treatments (leaf or fruit removal), performed at different scales (branch, half-tree).

| Tree treatment                   | Scale     | Fruit presence        | Pathways          |                        |      |                    |
|----------------------------------|-----------|-----------------------|-------------------|------------------------|------|--------------------|
|                                  |           |                       | Non-hydroxylating | Early-13-hydroxylating |      |                    |
|                                  |           |                       | GA9               | GA44                   | GA1  | GA8                |
| Control ON                       | Tree      | Fruiting              | 0.43              | 1.53                   | 2    | 18.67 <sup>a</sup> |
| Control OFF                      | Tree      | Non-Fruiting          | 2.05              | 0.86                   | 2.48 | 2.21 <sup>b</sup>  |
| Fruit removal                    | Branch    | Fruiting              | 0.4               | 1.22                   | 2.4  | 15.6 <sup>ab</sup> |
|                                  |           | Non-Fruiting          | 1.2               | 1.43                   | 1.9  | 3.34 <sup>b</sup>  |
|                                  | Half-tree | Fruiting              | 0.21              | 2.04                   | 1.92 | 3.83 <sup>b</sup>  |
|                                  |           | Non-Fruiting          | 2.57              | 1.41                   | 5.87 | 4.77 <sup>ab</sup> |
| Leaf removal                     | Branch    | Fruiting (foliated)   | 0.6               | 2.64                   | 2.36 | 3.65 <sup>b</sup>  |
|                                  |           | Fruiting (defoliated) | 0.34              | 1.76                   | 1.88 | 4.84 <sup>ab</sup> |
| Treatment effect                 |           |                       | ns                | ns                     | ns   | **                 |
| Mean value of fruiting parts     |           | Fruiting              | 0.39              | 1.92                   | 2.14 | 6.98               |
| Mean value of non-fruiting parts |           | Non-Fruiting          | 1.89              | 1.42                   | 3.89 | 4.06               |
| Fruit presence effect            |           |                       | **                | ns                     | ns   | ns                 |

795 *Treatment effect on GA concentration was estimated with a one-way ANOVA considering the tree treatment (control, leaf removal, and fruit removal),*  
 796 *and the scale (tree, shoot, branch, and one side of the Y-shape tree) at which treatments were performed. \*\* significant at 0.001 < P < 0.01 and ns*

797 non-significant. When significant differences were observed, a Tukey's HSD test for pairwise comparisons was made and different letters indicate statistically  
798 different values among treatments. The different conditions were then gathered depending on fruit presence, and the fruit presence effect was  
799 estimated with Kruskal Wallis test.. \*\* significant at  $0.001 < P < 0.01$  and ns non-significant.

800

801

802

803

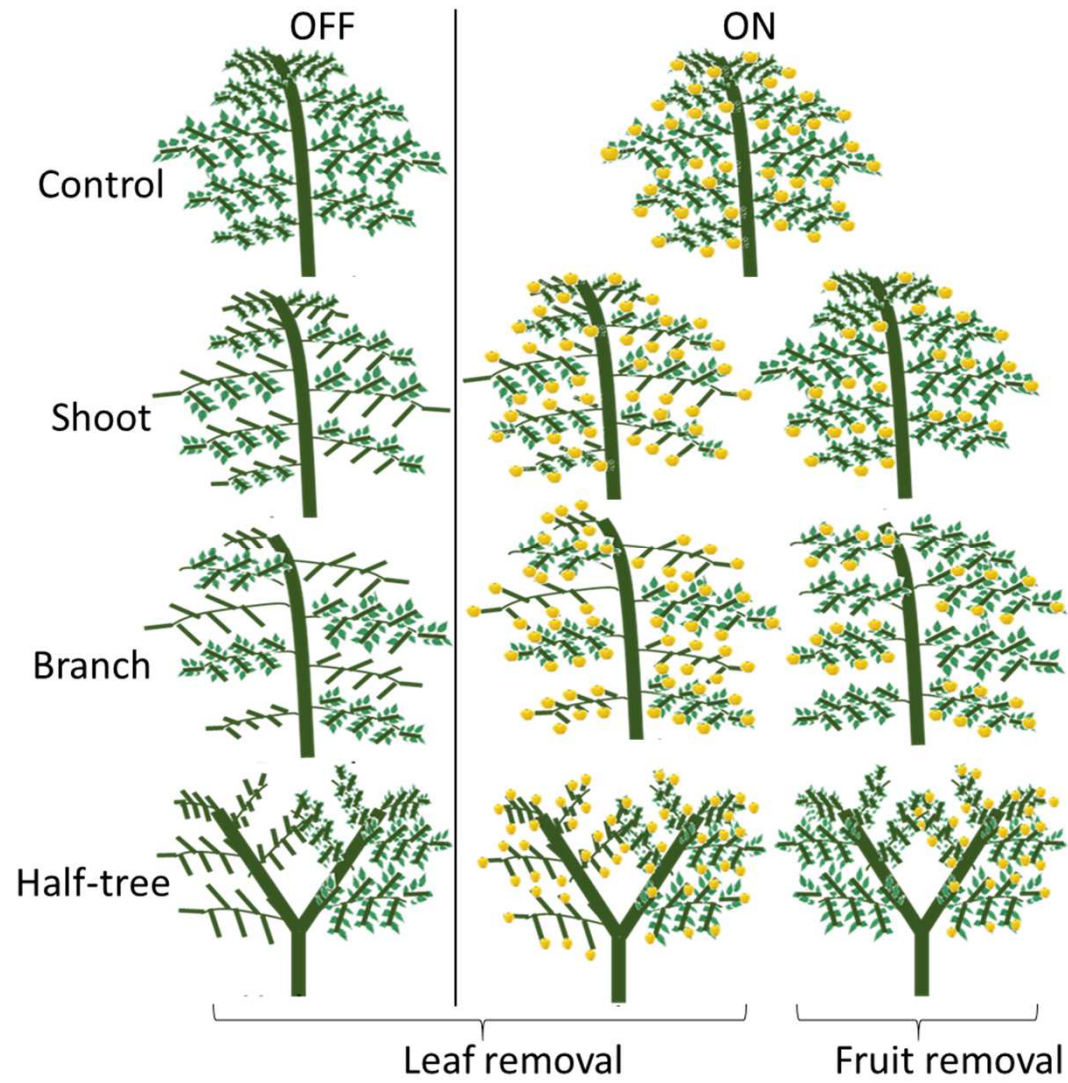

Figure 1

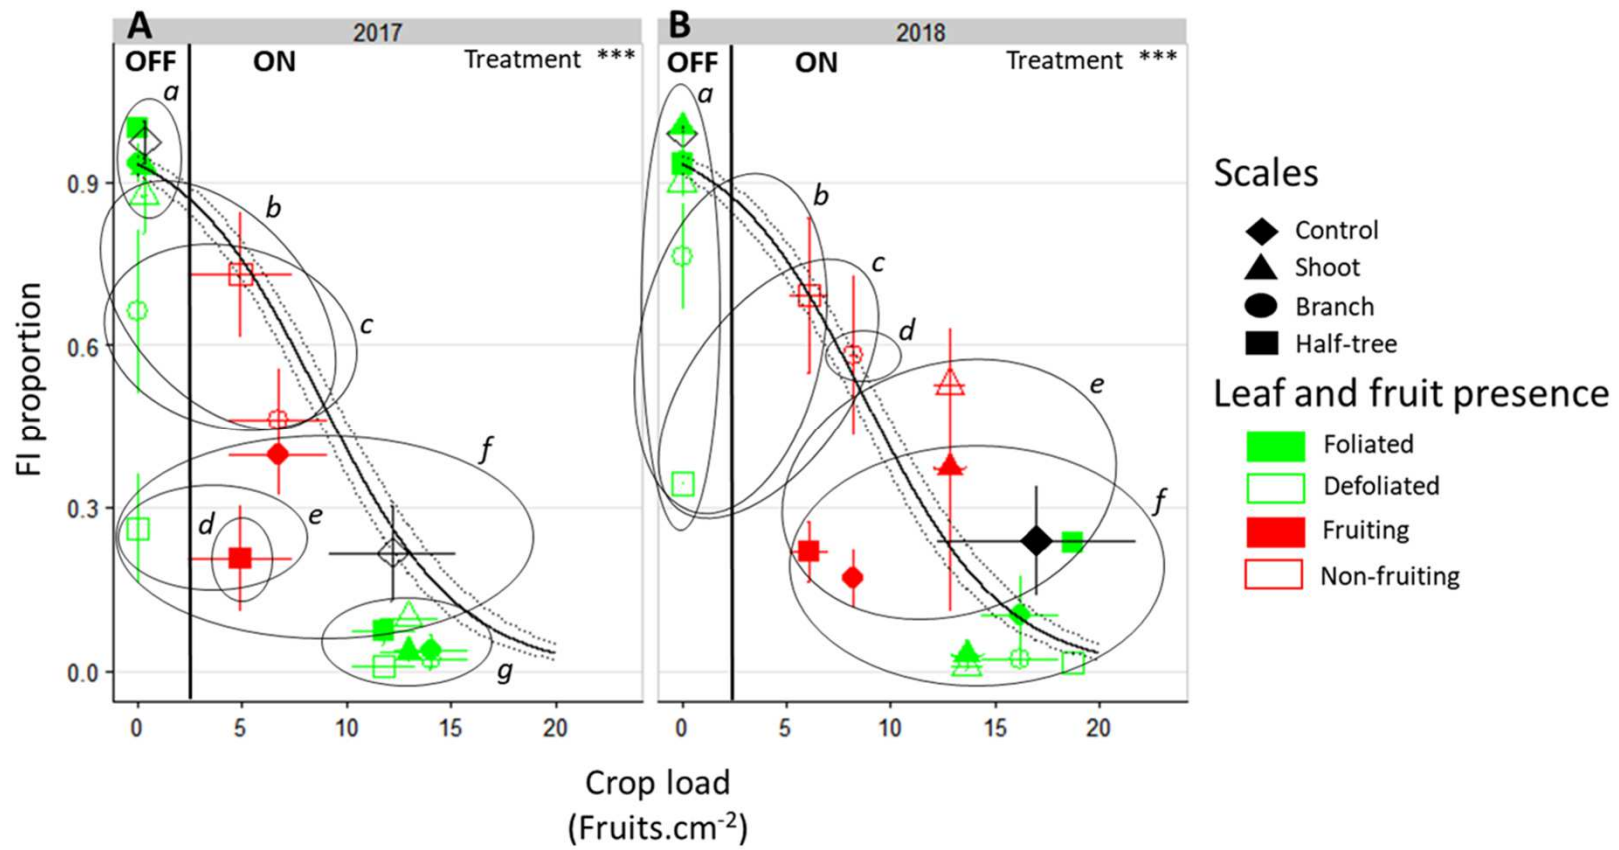

bioRxiv preprint doi: <https://doi.org/10.1101/612317>; this version posted April 17, 2019. The copyright holder for this preprint (which was not certified by peer review) is the author/funder, who has granted bioRxiv a license to display the preprint in perpetuity. It is made available under aCC-BY-ND 4.0 International license.

Figure 2

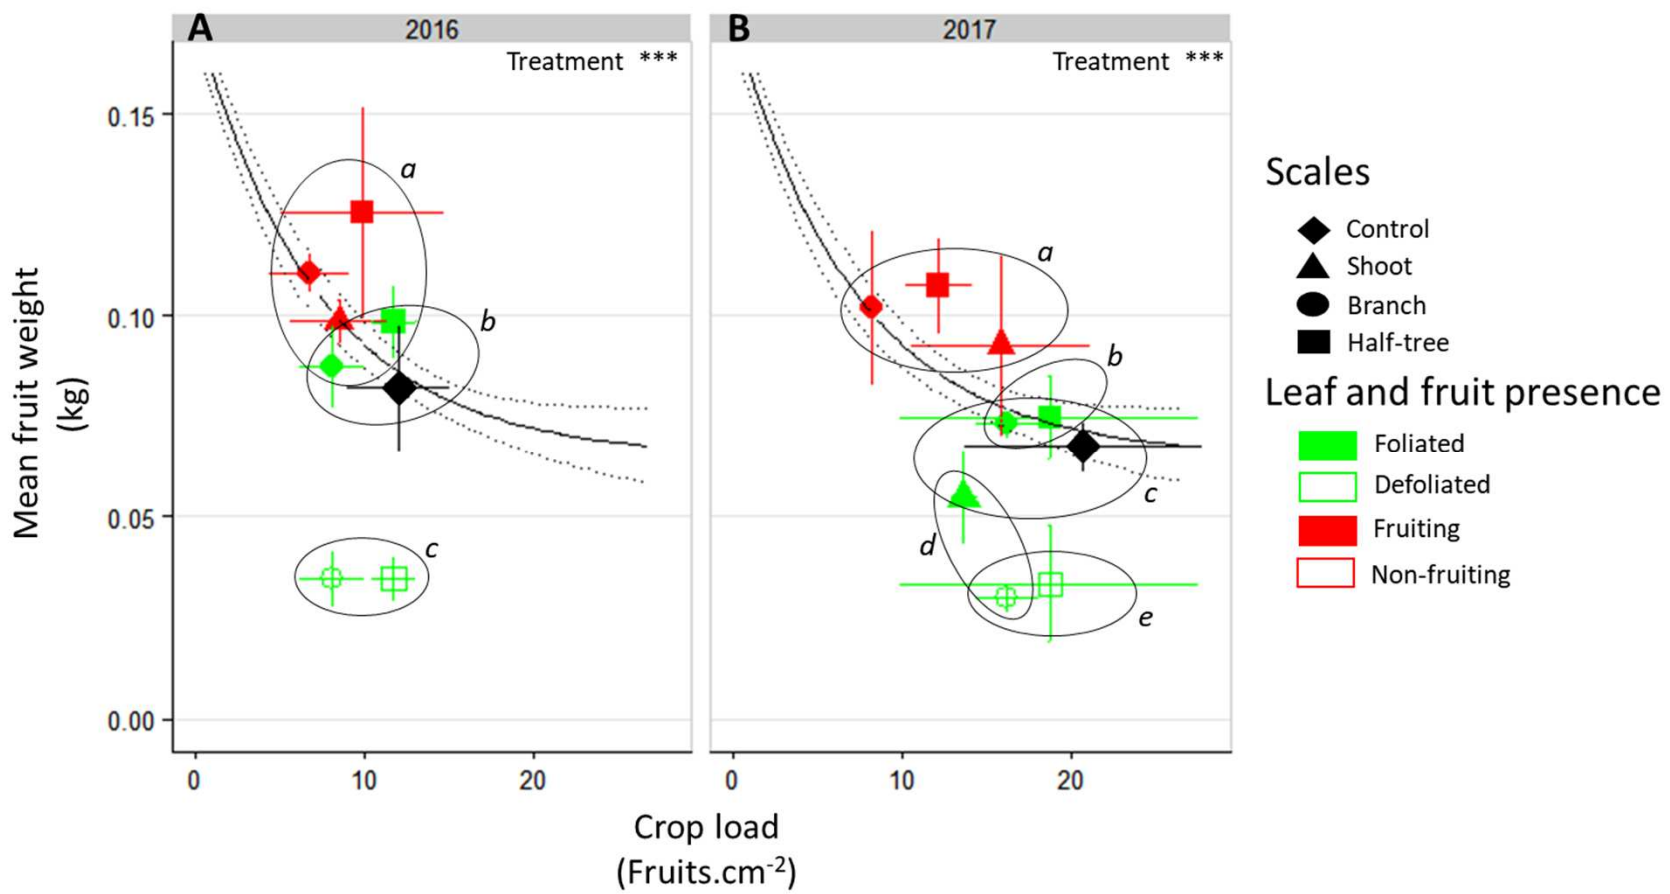



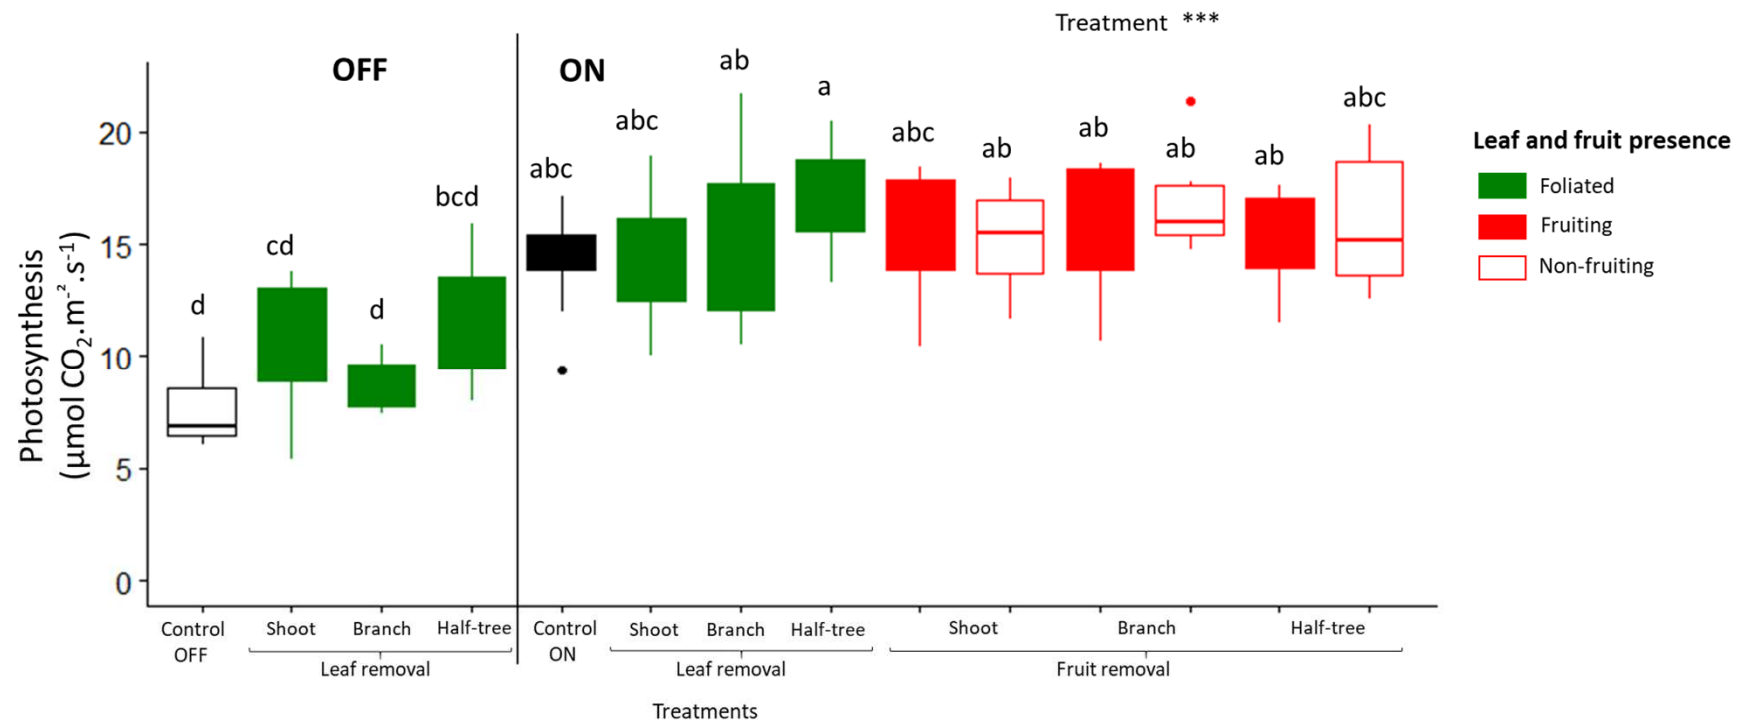

Figure 4

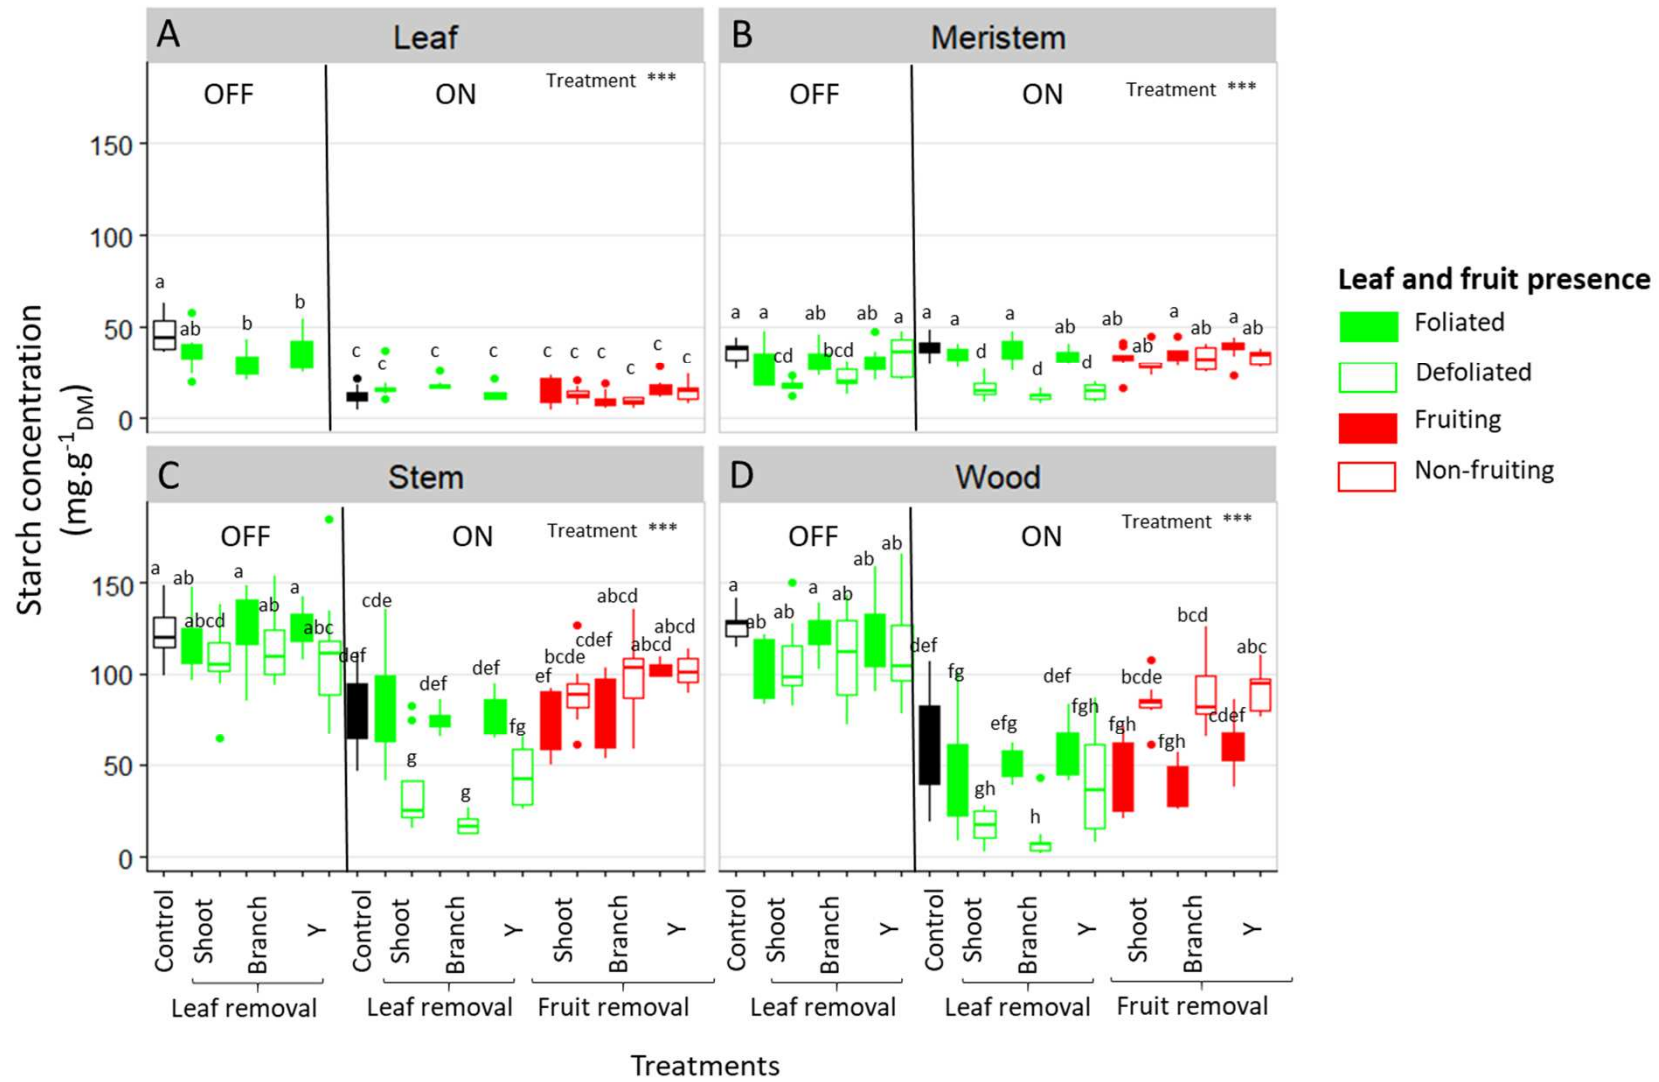

bioRxiv preprint doi: <https://doi.org/10.1101/612317>; this version posted April 17, 2019. The copyright holder for this preprint (which was not certified by peer review) is the author/funder, who has granted bioRxiv a license to display the preprint in perpetuity. It is made available under aCC-BY-ND 4.0 International license.

Figure 5
